# Supplementary material for: Ras/ERK and PI3K/AKT signaling differentially regulate oncogenic ERG mediated transcription in prostate cells
Source: PubMed Central journal article supplement (PMC8345871; doi:10.1371/journal.pgen.1009708), 2021-07-27

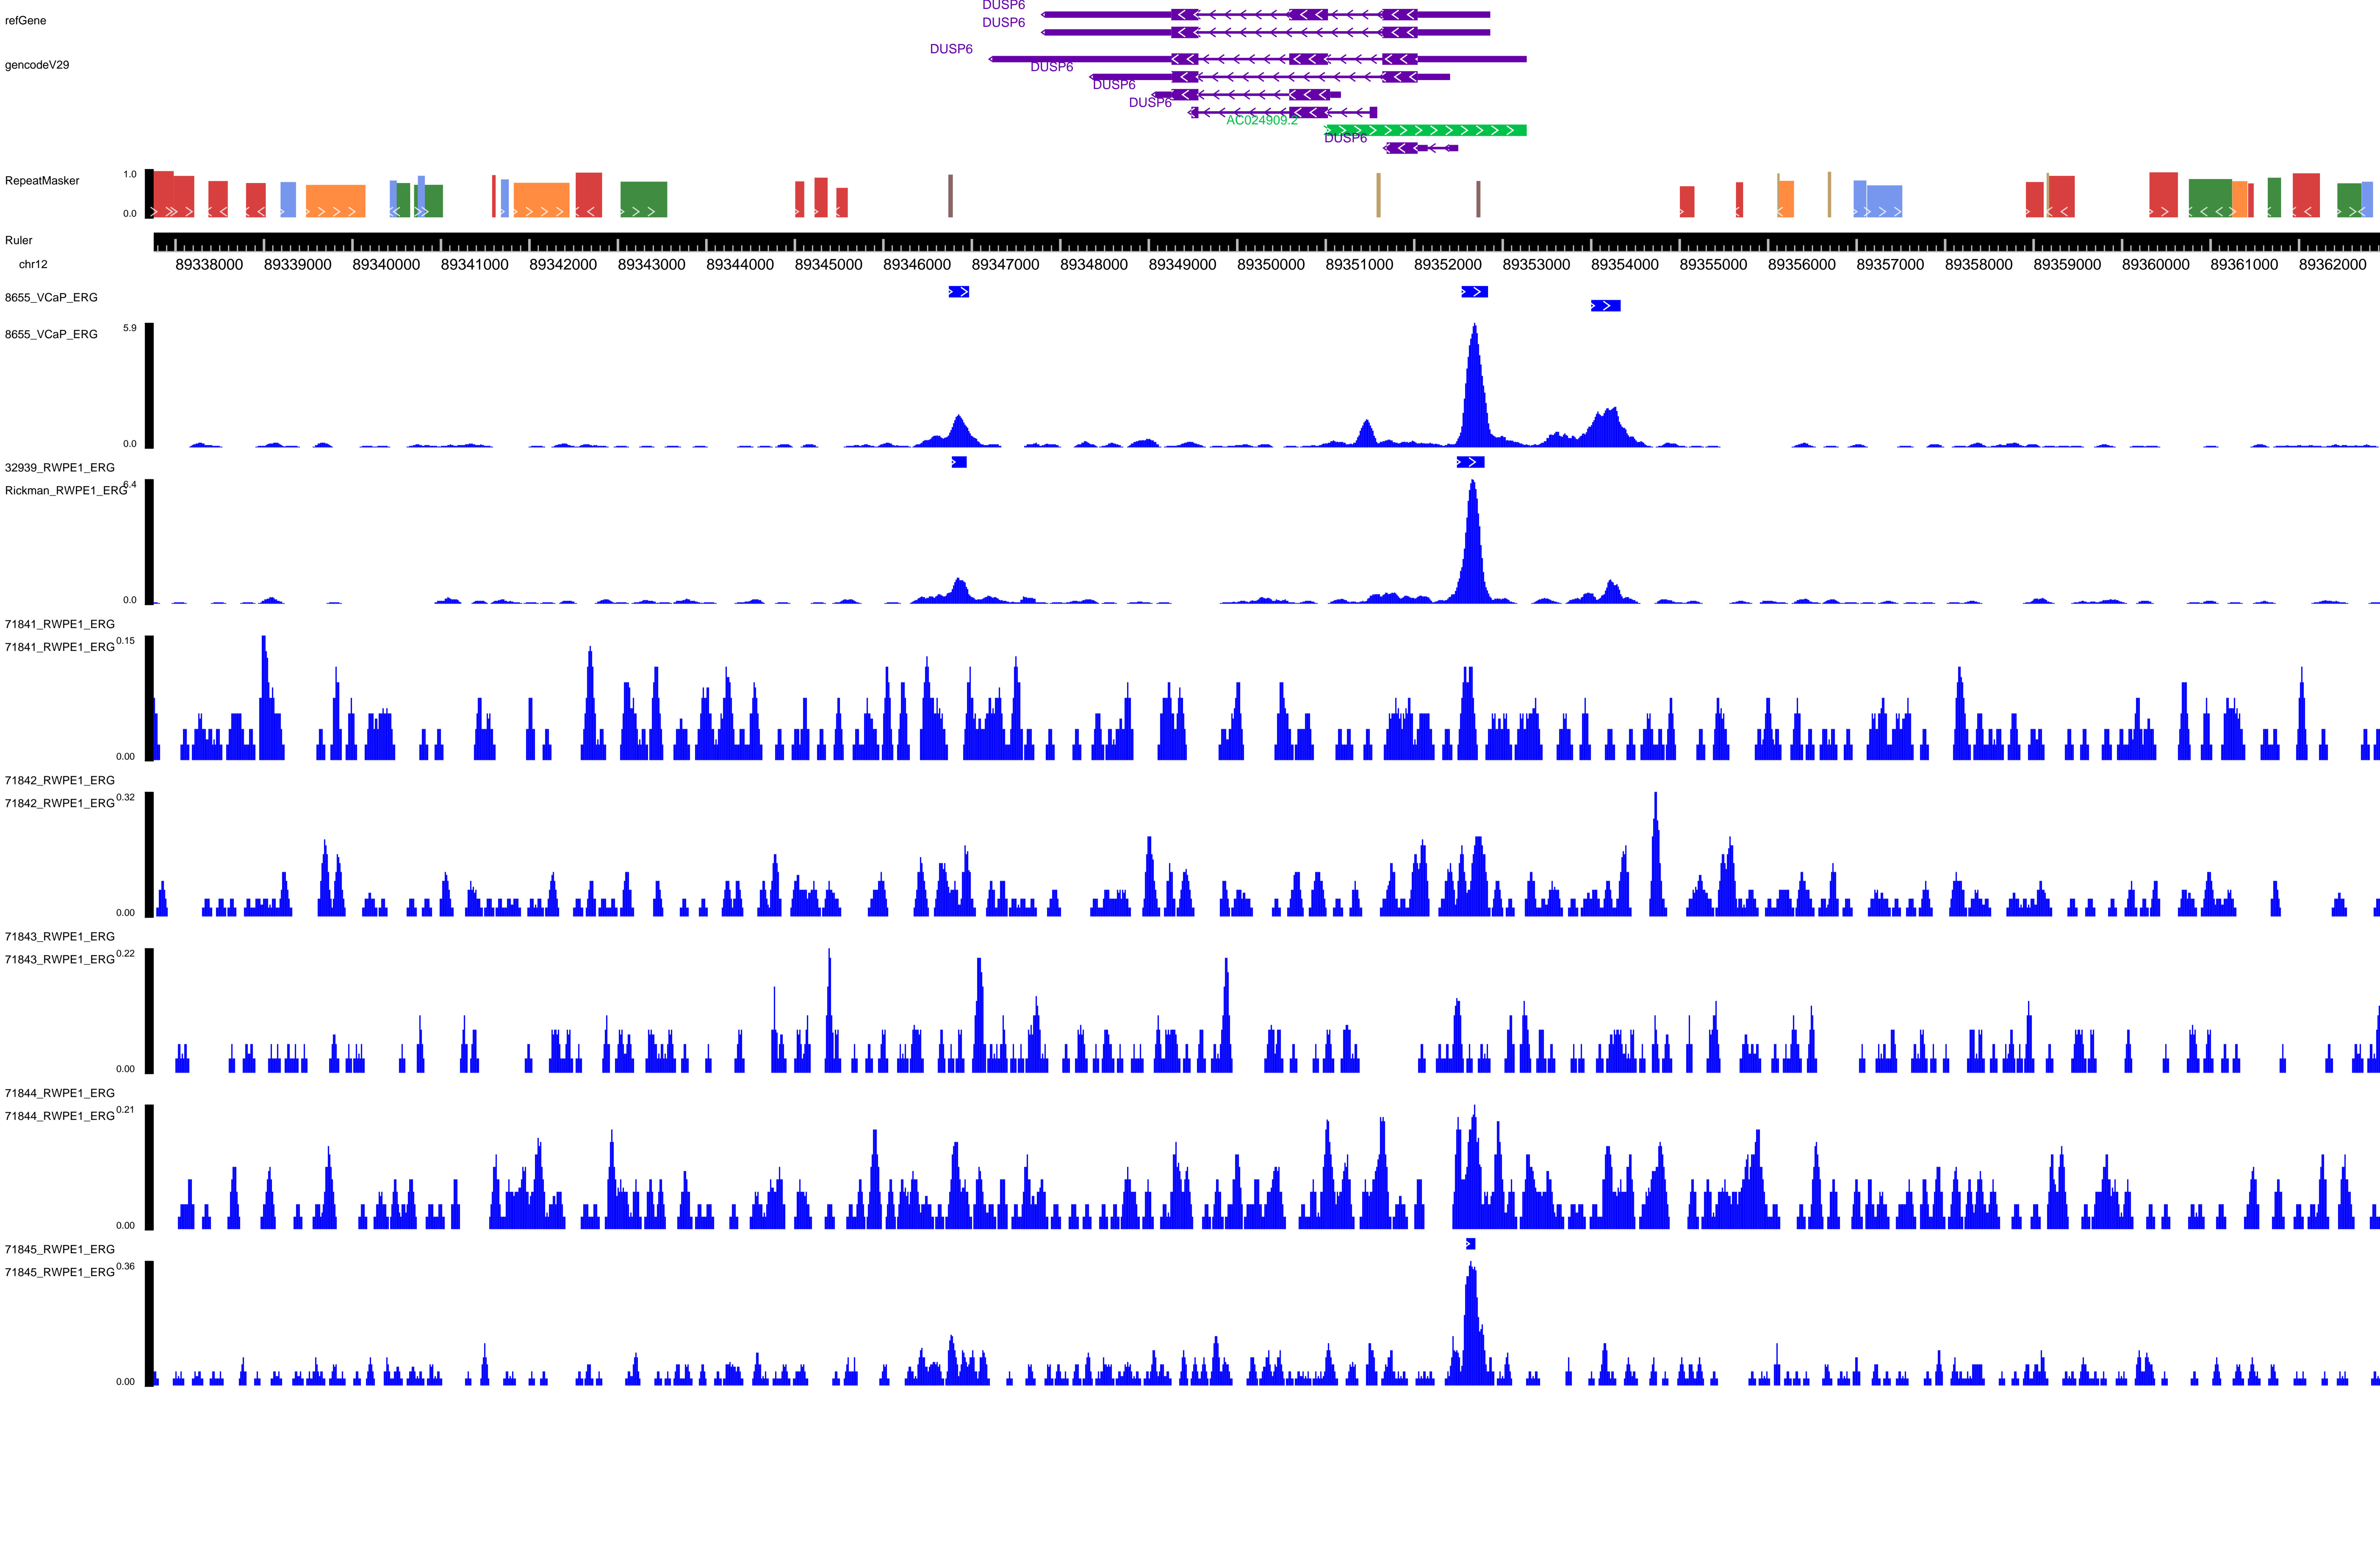

## Inspector

**Title:****Treatment**

- ERG-CHIP\_RWPE1-ERG(WT)\_REP2

**ID:****GEO or ENCODE:** GSM2195106**CistromeDB:** 71844**Species:**

Homo sapiens

**Citation:**

Kedage V, et al. An Interaction with Ewing's Sarcoma Breakpoint Protein EWS Defines a Specific Oncogenic Mechanism of ETS Factors Rearranged in Prostate Cancer. Cell Rep 2016

PMID: 27783944

**Factor:**

ERG

**Biological Source:****Cell Line:** RWPE1**Cell Type:** Epithelium**Tissue:** Prostate**Disease:** Normal[Meta-data Correction](#)**Quality Control**[Visualize](#)[WashU Browser](#)[UCSC Browser](#)**Download**[BED Peaks▼](#)[BIGWIG File▼](#)[Putative Targets](#)

## Tools

[QC reports](#)[QC motifs](#)[Get top putative targets](#)[Check a putative target](#)

| QC                                           | Sample                     |
|----------------------------------------------|----------------------------|
| Raw sequence median quality score            | 35                         |
| % Reads uniquely mapped                      | 86.7%                      |
| PCR bottleneck coefficient (PBC)             | 99.5%                      |
| Number of merged Total/Fold 10/Fold 20 peaks | 403 / 185 / 46             |
| Fraction of reads in peaks (FRiP)            | 0.4%                       |
| % Peaks in promoter/exon/intron/intergenic   | 3.6% / 5.5% / 5.5% / 85.4% |

**QC**

**Sample**

% Top 5k peaks overlapping with union DHS

36.2%

% Top 5k peaks Phastcon Conservation Profiles

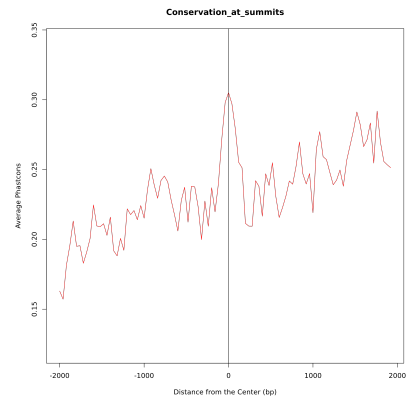

## Inspector

**Title:****Treatment**

- EWS-CHIP\_RWPE1-ERG(WT)

**ID:****GEO or ENCODE:** GSM2195108**CistromeDB:** 71843**Species:**

Homo sapiens

**Citation:**

Kedage V, et al. An Interaction with Ewing's Sarcoma Breakpoint Protein EWS Defines a Specific Oncogenic Mechanism of ETS Factors Rearranged in Prostate Cancer. Cell Rep 2016

PMID: 27783944

**Factor:**

ERG

**Biological Source:****Cell Line:** RWPE1**Cell Type:** Epithelium**Tissue:** Prostate**Disease:** Normal[Meta-data Correction](#)**Quality Control**[Visualize](#)[WashU Browser](#)[UCSC Browser](#)**Download**[BED Peaks▼](#)[BIGWIG File▼](#)[Putative Targets](#)

## Tools

[QC reports](#)[QC motifs](#)[Get top putative targets](#)[Check a putative target](#)

| QC                                           | Sample                     |
|----------------------------------------------|----------------------------|
| Raw sequence median quality score            | 39                         |
| % Reads uniquely mapped                      | 82.5%                      |
| PCR bottleneck coefficient (PBC)             | 98.4%                      |
| Number of merged Total/Fold 10/Fold 20 peaks | 391 / 190 / 35             |
| Fraction of reads in peaks (FRiP)            | 0.4%                       |
| % Peaks in promoter/exon/intron/intergenic   | 0.8% / 0.0% / 4.6% / 94.7% |

**QC**

**Sample**

% Top 5k peaks overlapping with union DHS

47.3%

% Top 5k peaks Phastcon Conservation Profiles

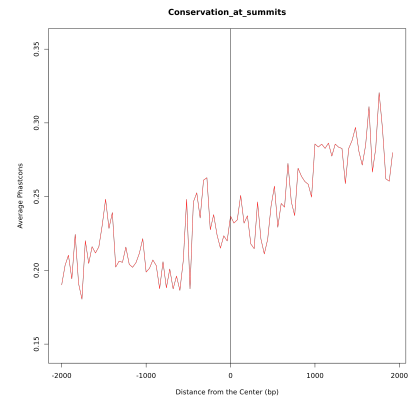

## Inspector

**Title:****Treatment**

- RWPE1-ERG CHIP-SEQ (ERG)

**ID:****GEO or ENCODE:** GSM927071**CistromeDB:** 32939**Species:**

Homo sapiens

**Citation:**

Rickman DS, et al. Oncogene-mediated alterations in chromatin conformation. Proc. Natl. Acad. Sci. U.S.A. 2012

PMID: 22615383

**Factor:**

ERG

**Biological Source:****Cell Line:** RWPE1**Cell Type:** Epithelium**Tissue:** Prostate**Disease:** Normal[Meta-data Correction](#)

### Quality Control

[Visualize](#)[WashU Browser](#)[UCSC Browser](#)

### Download

[BED Peaks▼](#)[BIGWIG File▼](#)[Putative Targets](#)

## Tools

[QC reports](#)[QC motifs](#)[Get top putative targets](#)[Check a putative target](#)

| QC                                           | Sample                       |
|----------------------------------------------|------------------------------|
| Raw sequence median quality score            | 39                           |
| % Reads uniquely mapped                      | 78.2%                        |
| PCR bottleneck coefficient (PBC)             | 95.3%                        |
| Number of merged Total/Fold 10/Fold 20 peaks | 10036 / 3552 / 367           |
| Fraction of reads in peaks (FRiP)            | 2.4%                         |
| % Peaks in promoter/exon/intron/intergenic   | 14.0% / 9.3% / 34.4% / 42.2% |

**QC**

**Sample**

% Top 5k peaks overlapping with union DHS

97.3%

% Top 5k peaks Phastcon Conservation Profiles

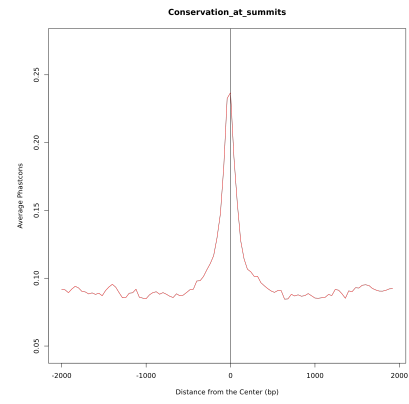

Supplement: pgen.1009708.s006.pdf [file pgen.1009708.s006.pdf]
